# Supplementary material
Source: HighWire-hosted journal article supplement (http://www.cmajopen.ca/highwire/filestream/90670/field_highwire_adjunct_files/3/open-2022-0210-4-at.pdf)
Supplement: open-2022-0210-4-at.pdf [file open-2022-0210-4-at.pdf]

**Table 1: Vaccination status, clinical and demographic characteristics in Ontario and by diagnostic categories.**

|                     |                    | No Mental Disorders |           |           | Anxiety Disorder |         | Substance Abuse Disorder |         | Psychotic Disorder |         | Mood Disorder |         | Other Disorders |         | Ontario   |           |      |      |
|---------------------|--------------------|---------------------|-----------|-----------|------------------|---------|--------------------------|---------|--------------------|---------|---------------|---------|-----------------|---------|-----------|-----------|------|------|
|                     |                    | 0 Doses             | 2 Doses   | 0 Doses   | 2 Doses          | 0 Doses | 2 Doses                  | 0 Doses | 2 Doses            | 0 Doses | 2 Doses       | 0 Doses | 2 Doses         | 0 Doses | 2 Doses   |           |      |      |
|                     |                    | N                   | 1,799,432 | 7,434,607 | 55,580           | 237,462 | 86,850                   | 188,773 | 20,915             | 55,135  | 128,821       | 625,909 | 126,830         | 593,755 | 2,218,428 | 9,135,641 |      |      |
| Vaccination (%)     |                    |                     | 18.7      | 77.1      | 17.9             | 76.5    | 28.6                     | 62.3    | 25.6               | 67.4    | 16.2          | 78.5    | 16.6            | 77.9    | 18.6      | 76.8      |      |      |
| MHA severity (%)    | No MHA Utilization | 9,645,951           | 18.7      | 77.1      |                  |         |                          |         |                    |         |               |         |                 |         |           |           | 18.7 | 77.1 |
|                     | Outpatient visit   | 1,736,866           | NA        |           | 14.4             | 81.5    | 26.3                     | 65.5    | 19.8               | 74.9    | 15.3          | 79.7    | 14.6            | 80.7    | 16.1      | 78.8      |      |      |
|                     | ED Visit           | 354,229             | NA        |           | 23.4             | 68.9    | 31.4                     | 58.8    | 31.9               | 60.2    | 23.1          | 68.5    | 27.4            | 63.6    | 26.7      | 64.6      |      |      |
|                     | Hospitalization    | 163,822             | NA        |           | 21.6             | 70.1    | 32.9                     | 55.7    | 31.7               | 59.2    | 21.6          | 70.3    | 26.1            | 64.5    | 27.1      | 63.6      |      |      |
| Age categories (%)  | 19-29              | 2,079,448           | 24.6      | 67.6      | 25.3             | 65.1    | 36.6                     | 51.6    | 34.8               | 54.4    | 20.6          | 70.8    | 21.9            | 69.4    | 24.5      | 67.4      |      |      |
|                     | 30-39              | 2,158,551           | 26.3      | 67.7      | 25.4             | 66.9    | 40.3                     | 48.1    | 34.2               | 57.1    | 22.4          | 70.5    | 24.1            | 68.6    | 26.4      | 67.2      |      |      |
|                     | 40-49              | 1,927,921           | 20.8      | 74.6      | 18.3             | 76.0    | 31.3                     | 58.6    | 26.8               | 65.8    | 17.3          | 77.0    | 17.3            | 77.1    | 20.6      | 74.5      |      |      |
|                     | 50-59              | 2,082,805           | 16.8      | 79.8      | 14.3             | 81.8    | 21.5                     | 70.8    | 21.8               | 72.3    | 13.8          | 82.0    | 13.3            | 82.8    | 16.4      | 79.9      |      |      |
|                     | 60-69              | 1,842,353           | 12.6      | 85.2      | 11.1             | 86.4    | 13.5                     | 81.8    | 17.5               | 78.0    | 10.7          | 86.6    | 10.2            | 87.4    | 12.4      | 85.3      |      |      |
|                     | 70-79              | 1,180,247           | 9.7       | 88.9      | 7.9              | 90.4    | 8.6                      | 88.9    | 14.0               | 82.7    | 7.4           | 90.9    | 7.4             | 91.0    | 9.4       | 89.1      |      |      |
| Sex (%)             | 80+                | 629,543             | 10.0      | 88.6      | 6.4              | 92.1    | 7.0                      | 90.8    | 12.9               | 84.7    | 6.5           | 91.9    | 7.1             | 91.3    | 9.6       | 89.0      |      |      |
|                     | Female             | 6,071,945           | 17.3      | 78.9      | 16.5             | 78.4    | 26.5                     | 64.7    | 21.9               | 72.0    | 15.1          | 79.9    | 15.8            | 78.9    | 17.2      | 78.6      |      |      |
| Income Quintile (%) | Male               | 5,828,923           | 20.0      | 75.3      | 20.5             | 73.1    | 29.8                     | 60.9    | 28.2               | 64.1    | 18.1          | 76.0    | 17.4            | 77.0    | 20.1      | 74.8      |      |      |
|                     | 1                  | 2,314,874           | 23.6      | 70.8      | 23.5             | 69.2    | 34.5                     | 54.9    | 28.0               | 64.3    | 20.8          | 72.3    | 22.1            | 70.6    | 23.8      | 70.2      |      |      |
|                     | 2                  | 2,362,716           | 19.9      | 75.5      | 19.7             | 74.2    | 30.1                     | 60.3    | 26.0               | 66.5    | 17.3          | 77.0    | 18.2            | 75.9    | 19.9      | 75.1      |      |      |
|                     | 3                  | 2,400,986           | 18.1      | 77.5      | 17.4             | 77.0    | 26.9                     | 64.5    | 24.6               | 68.9    | 15.7          | 79.1    | 16.2            | 78.4    | 18.0      | 77.3      |      |      |
|                     | 4                  | 2,393,120           | 16.8      | 79.4      | 15.9             | 79.3    | 24.7                     | 67.2    | 22.5               | 71.4    | 14.0          | 81.2    | 14.7            | 80.5    | 16.6      | 79.3      |      |      |
| Homeless (%)        | 5                  | 2,394,993           | 15.1      | 81.8      | 12.9             | 83.1    | 21.0                     | 72.0    | 21.6               | 72.7    | 12.1          | 84.0    | 12.1            | 84.1    | 14.8      | 81.9      |      |      |
|                     | No                 | 11,852,091          | 18.6      | 77.1      | 17.8             | 76.7    | 27.5                     | 63.7    | 23.8               | 69.7    | 16.0          | 78.7    | 16.3            | 78.3    | 18.5      | 76.9      |      |      |
| Urban (%)           | Yes                | 48,777              | 40.5      | 49.5      | 42.4             | 43.8    | 45.5                     | 39.8    | 41.6               | 46.4    | 37.5          | 49.8    | 43.2            | 43.7    | 42.7      | 44.2      |      |      |
|                     | Rural              | 10,658,793          | 18.5      | 77.2      | 17.3             | 77.2    | 28.2                     | 62.8    | 25.4               | 67.7    | 15.8          | 78.9    | 16.3            | 78.4    | 18.4      | 77.0      |      |      |
| cADGs (%)           | Urban              | 1,212,243           | 19.8      | 76.0      | 22.2             | 71.6    | 31.4                     | 59.5    | 27.0               | 65.8    | 19.5          | 74.6    | 19.9            | 74.1    | 20.3      | 75.0      |      |      |
|                     | 0-3                | 3,942,112           | 29.4      | 65.3      | 24.9             | 68.1    | 37.6                     | 52.2    | 34.7               | 57.6    | 22.6          | 70.7    | 22.9            | 70.2    | 29        | 65.4      |      |      |
|                     | 4-5                | 4,601,684           | 14.8      | 81        | 18.9             | 75.1    | 29.3                     | 61.2    | 25.8               | 67      | 16.9          | 77.4    | 17.2            | 76.9    | 15.7      | 79.6      |      |      |

Appendix 4, as supplied by the authors. Appendix to: Kurdyak P, Lebenbaum M, Patrikar A, et al. SARS-CoV-2 vaccination prevalence by mental health diagnosis: a population-based cross-sectional study in Ontario, Canada. *CMAJ Open* 2023. doi: 10.9778/cmajo.20220210. Copyright © 2023 The Author(s) or their employer(s). To receive this resource in an accessible format, please contact us at [cmajgroup@cmaj.ca](mailto:cmajgroup@cmaj.ca).

|  |    |           |     |      |      |      |      |      |      |    |      |      |      |      |      |      |
|--|----|-----------|-----|------|------|------|------|------|------|----|------|------|------|------|------|------|
|  | 6+ | 3,357,072 | 9.4 | 87.8 | 14.1 | 81.4 | 20.8 | 71.5 | 17.9 | 76 | 12.3 | 83.4 | 12.4 | 83.4 | 10.5 | 86.2 |
|--|----|-----------|-----|------|------|------|------|------|------|----|------|------|------|------|------|------|

Legend: MHA – Mental Health and Addictions; cADG = collapsed Aggregated Diagnosis Group
